# Supplementary material for: Novel non-specific DNA adenine methyltransferases
Source: PubMed Central journal article supplement — Nucleic Acids Res. 2011 Nov 17;40(5):2119–30. doi: 10.1093/nar/gkr1039 (PMC3299994; doi:10.1093/nar/gkr1039), 2011-11-17
Supplement: supp_gkr1039_nar-00308-h-2011-File005.pdf [file supp_gkr1039_nar-00308-h-2011-File005.pdf]

**Table 3S.** Summary of the sensitivity of different restriction endonucleases to modifications introduced by the Nme1821 enzyme.

| <b>REase</b> | <b>Recognition site</b> | <b>Number of sites in pNmeET</b> | <b>Cleavage<sup>a</sup></b> |
|--------------|-------------------------|----------------------------------|-----------------------------|
| AdeI         | CACNNNGTG               | 1                                | N                           |
| BglII        | AGaTCT                  | 1                                | N                           |
| Bsh1285I     | CGRYCG<br>R=A/G         | 5                                | N                           |
| Bsp119I      | TTCGAA                  | 0(2) <sup>b</sup>                | N                           |
| Bsu15I       | ATCGAT                  | 2                                | N                           |
| CaiI         | CAGNNNCTG               | 1                                | N                           |
| CseI         | GACGC                   | 12                               | N                           |
| CviQI        | GTAC                    | 6                                | N                           |
| DraI         | TTTAAA                  | 2                                | N                           |
| Eam1104I     | GAAGAG                  | 3                                | N                           |
| Eco147I      | AGGCCT                  | 0(1) <sup>b</sup>                | N                           |
| Eco47III     | AGCGCT                  | 3                                | N                           |
| Eco91I       | GGTNACC                 | 1                                | N                           |
| Eco32I       | GATATC                  | 0(1) <sup>b</sup>                | P, L                        |
| EcoRI        | GAATTC                  | 1                                | N                           |
| HindIII      | AaGCTT                  | 0(1) <sup>b</sup>                | N                           |
| HinfI        | GANTC                   | 20                               | N                           |
| HphI         | GGTGA/TCACC             | 17                               | N                           |
| LweI         | GCATC                   | 27                               | N                           |
| MboI*        | GATC                    | 23                               | N                           |
| MluI         | ACGCGT                  | 1                                | N                           |
| MlyI         | GAGTC/GACTC             | 9                                | N                           |
| Mph1103I     | ATGCAT                  | 2                                | N                           |
| MunI         | CAATTG                  | 2                                | N                           |
| NdeI         | CaTATG                  | 1                                | N                           |
| NlaIII       | CATG                    | 26                               | N                           |
| PaeI         | GCATGC                  | 1                                | N                           |
| PfeI         | GAWTC                   | 11                               | N                           |
| PscI         | ACATGT                  | 1                                | N                           |
| PstI         | CTGCAG                  | 1                                | N                           |
| PvuII        | CAGCTG                  | 3                                | N                           |
| SchI         | GAGTC/GACTC             | 9                                | N                           |
| XbaI         | TCTGAG                  | 1                                | N                           |
| XhoI         | CTCGAG                  | 1                                | N                           |
| XmiI         | GTMKAC                  | 3                                | N                           |
| BpiI         | GAAGAC                  | 5                                | P                           |
| AluI         | AGCT                    | 24                               | P,                          |
| HincII       | GTYRAC                  | 2                                | P, L                        |
| KspAI        | GAATTC                  | 1                                | P, L                        |
| SspI         | aATATT                  | 3                                | P                           |
| TaiI         | ACGT                    | 18                               | P, L                        |
| TasI         | AATT                    | 27                               | P                           |
| TaqI         | TCGA                    | 18                               | P, L                        |
| TruII        | TTAA                    | 28                               | P                           |
| VspI         | ATTAAT                  | 5                                | P,L                         |
| XapI         | RAATTY                  | 6                                | P                           |

| REase    | Recognition site    | Number of sites in pNmeET | Cleavage <sup>a</sup> |
|----------|---------------------|---------------------------|-----------------------|
| BcnI     | CCSGG               | 13                        | Y                     |
| BglI     | GGCN5GCC            | 2                         | Y                     |
| Bme1390I | CCNGG               | 23                        | Y                     |
| Bpu1102I | GCTNAGC             | 2                         | Y                     |
| Bsh1236I | CGCG                | 37                        | Y                     |
| Bsp143I* | GATC                | 23                        | Y                     |
| Bsp120I  | GGGCCC              | 1                         | Y                     |
| Bsp68I   | TCGCGA              | 1                         | Y                     |
| BspLI    | GGNNCC              | 22                        | Y                     |
| Bst1107I | GTATAC              | 1                         | Y                     |
| BsuRI    | GGCC                | 28                        | Y                     |
| Csp6I    | GTAC                | 6                         | Y                     |
| DpnI*    | Gm <sup>6</sup> ATC | 23                        | Y                     |
| Eco130I  | CCWWGG              | 2                         | Y                     |
| Eco88I   | CYCGRG              | 2                         | Y                     |
| EcoO109I | RGGNCCY             | 3                         | Y                     |
| FspBI    | CTAG                | 8                         | Y                     |
| Hin1I    | GRCGYC              | 5                         | Y                     |
| Hin6I    | GCGC                | 53                        | Y                     |
| HpyF10VI | GCN7GC              | 46                        | Y                     |
| MbiI     | GAGCGG/CCGCTC       | 4                         | Y                     |
| MspI     | CCGG                | 32                        | Y                     |
| PvuI     | CGATCG              | 1                         | Y                     |
| SmaI     | CCCGGG              | 1                         | Y                     |

<sup>a</sup>**Abbreviations:** Y, complete cleavage; N, no digestion; P, partial digestion; L, plasmid linearized.

(<sup>b</sup>) – number of recognition sites in plasmid pAltOKI

\*tested in  $\lambda$  DNA dam- *in vitro* methylated with the Nme1821 enzyme.

**Table 4S.** Summary of the sensitivity of different restriction endonucleases to modifications introduced by the Hin1523 enzyme.

| <b>REase</b> | <b>Recognition site</b> | <b>Number of sites<br/>in pHinET</b> | <b>Cleavage<sup>a</sup></b> |
|--------------|-------------------------|--------------------------------------|-----------------------------|
| AdeI         | CACNNNGTG               | 1                                    | N                           |
| Bsh1285I     | CGRYCG<br>R=A/G         | 4                                    | N                           |
| Bsu15I       | ATCGAT                  | 2                                    | N                           |
| CaiI         | CAGNNNCTG               | 1                                    | N                           |
| Eco147I      | AGGCCT                  | 0 (1) <sup>b</sup>                   | N                           |
| Eco32I       | GATATC                  | 0 (1) <sup>b</sup>                   | N                           |
| Mph1103I     | ATGCAT                  | 2                                    | N                           |
| MunI         | CAATTG                  | 1                                    | N                           |
| PaeI         | GCATGC                  | 1                                    | N                           |
| PscI         | ACATGT                  | 1                                    | N                           |
| PstI         | CTGCAG                  | 0 (2) <sup>b</sup>                   | N                           |
| XhoI         | CTCGAG                  | 1                                    | N                           |
| XmiI         | GTMKAC                  | 1                                    | N                           |
| TaiI         | ACGT                    | 16                                   | P, L                        |
| AluI         | AGCT                    | 23                                   | P                           |
| BpiI         | GAAGAC                  | 4                                    | P                           |
| BglII        | AGaTCT                  | 1                                    | P                           |
| CseI         | GACGC                   | 12                                   | P                           |
| CviQI        | GTAC                    | 4                                    | P,L                         |
| DpnI*        | Gm <sup>6</sup> ATC     | 23                                   | Y                           |
| Eam1104I     | GAAGAG                  | 3                                    | P                           |
| Eco47III     | AGCGCT                  | 3                                    | P                           |
| Eco91I       | GGTNACC                 | 1                                    | P                           |
| EcoRI        | GAATTC                  | 1                                    | P                           |
| HindIII      | AaGCTT                  | 0 (1) <sup>b</sup>                   | P                           |
| HinfI        | GANTC                   | 19                                   | P                           |
| HphI         | GGTGA/TCACC             | 18                                   | P                           |
| LweI         | GCATC                   | 23                                   | P                           |
| MboI*        | GATC                    | 23                                   | N                           |
| MluI         | ACGCGT                  | 1                                    | P                           |
| MlyI         | GAGTC/GACTC             | 10                                   | P                           |
| NdeI         | CaTATG                  | 1                                    | P                           |
| NlaIII       | CATG                    | 27                                   | P                           |
| PfeI         | GAWTC                   | 9                                    | N                           |
| PvuII        | CAGCTG                  | 3                                    | P                           |
| SchI         | GAGTC/GACTC             | 10                                   | P                           |
| TaqI         | TCGA                    | 15                                   | P, L                        |
| TasI         | AATT                    | 30                                   | P                           |
| TruII        | TTAA                    | 32                                   | P                           |
| VspI         | ATTAAT                  | 5                                    | P                           |
| XapI         | RAATTY                  | 9                                    | P                           |
| XbaI         | TCTGAG                  | 1                                    | P                           |
| Bsp119I      | TTCGAA                  | 0 (1) <sup>b</sup>                   | P                           |
| HincII       | GTYRAC                  | 1 (GTTAAC)                           | P                           |
| KspAI        | GAATTC                  | 1                                    | P                           |
| SspI         | aATATT                  | 3                                    | P                           |

| REase    | Recognition site | Number of sites<br>in pHinET | Cleavage <sup>a</sup> |
|----------|------------------|------------------------------|-----------------------|
| BcnI     | CCSGG            | 12                           | Y                     |
| BglI     | GGCN5GCC         | 1                            | Y                     |
| Bme1390I | CCNGG            | 21                           | Y                     |
| Bpu1102I | GCTNAGC          | 2                            | Y                     |
| Bsh1236I | CGCG             | 37                           | Y                     |
| Bsp143I* | GATC             | 23                           | Y                     |
| Bsp120I  | GGGCCC           | 1                            | Y                     |
| Bsp68I   | TCGCGA           | 1                            | Y                     |
| BspLI    | GGNNCC           | 20                           | Y                     |
| Bst1107I | GTATAC           | 1                            | Y                     |
| BsuRI    | GGCC             | 22                           | Y                     |
| Csp6I    | GTAC             | 3                            | Y                     |
| DraI     | TTTAAA           | 2                            | Y                     |
| Eco130I  | CCWWGG           | 1                            | Y                     |
| Eco88I   | CYCGRG           | 2                            | Y                     |
| EcoO109I | RGGNCCY          | 3                            | Y                     |
| FspBI    | CTAG             | 6                            | Y                     |
| Hin1I    | GRCGYC           | 5                            | Y                     |
| Hin6I    | GCGC             | 32                           | Y                     |
| HpyF10VI | GCN7GC           | 41                           | Y                     |
| MbiI     | GAGCGG/CCGCTC    | 4                            | Y                     |
| MspI     | CCGG             | 29                           | Y                     |
| PvuI     | CGATCG           | 1                            | Y                     |

<sup>a</sup>**Abbreviations:** Y, complete cleavage; N, no digestion, P, partial digestion, L, plasmid linearized.  
(b) –number of recognition sites in plasmid pAltOKI

\*tested in  $\lambda$  DNA dam- *in vitro* methylated with the Hin1523 enzyme.



```

1   GTTGGCGGTT TAGTCCGAAT CAACTTGCCA TAATGTTCAA TAAAAGAAGA ATTTAAAGGA GAGTTTACCC TGCACAAAGT TTAATTCAGT AAAGAAAAGA CGGCGATAAC AACGGCACTA GGAATGCTCG
131  TTGTTACCAG CTACGCAGAG AGTACCTGCA TATAGCCATA CGCCGCCTAC CTTGCGCAAG GCGGGCGGAT TGTAACAAAT CTTTTGATTA GGAGAAATAT ATGCAGTCAA TTAAAGCAAT CCGTTGCACA
>>.....ComHia.....>
      M Q S I K A I R C T
261  TTTTGTAACA AATTATTGGC GAAAGTAGGG ATGGTTGGTT ATTTAGAAAT CAAATGCCCT CGTTGCAAAA CCGTTAATAC TACACGTTAA TTTGATTTGA GTGTCAGAAT GCCTTGAGCA TCGGAACGCC
>.....ComHia.....>>
      F C N K L L A K V G M V G Y L E I K C P R C K T V N T T R -
391  ATAGAATAGA AAGGAAAAAC TATGGCAAAT CAAAACACCT TTAACAAGC CCCCTGCCA TTTATCGGAC AAAAACGAAT GTTTCTCAAA CAATTCGAGC AGATTTTAAA TGAGAATATT TCCGATAACG
>>.....Hia5.....>
      M A N Q N T F K Q A P L P F I G Q K R M F L K Q F E Q I L N E N I S D N
521  GCGAAGGCTG GACAATTCTT GACACTTTTG GCGGTTTCAGG CTTACTCAGT CACACCGCCA AACGGTTAAA ACCGAAAGCC CGCGTCATTT ACAATGATTT TGATGGCTAT GCGGAGCGAT TGGCACACAT
>.....Hia5.....>
      G E G W T I L D T F G G S G L L S H T A K R L K P K A R V I Y N D F D G Y A E R L A H
651  TGATGATATT AACCAAGTTC GAGCCGAGCT TTAAGTCTGTA GTTGTAATG CTACGTCAAA AAATAAACGT ATGACGAAGG ATTGTAAAGC AGAATGCATC AGAATTATTC AAAACTTCAA AGGATATAAA
>.....Hia5.....>
      I D D I N Q L R A E L Y S V V G N A T S K N K R M T K D C K A E C I R I I Q N F K G Y K
781  GATCTAAATG GCTTAGCGAG TTGGTTATTG TTCAGTGGGC AACCAAGTGC AACGCTTGAT GACTTATTC AACATAATTT CTGGCATTGT ATTCGTCAGT CTGATTATCC AAAGGCTGAT GGCTATTTGG
>.....Hia5.....>
      D L N C L A S W L L F S G Q Q V A T L D D L F Q H N F W H C I R Q S D Y P K A D G Y L
911  ACGGCGTAGA GATTGTGAAA GAATCATTCC ACACGCTTTT GCCTAAGTTT AGCAATGATC CGAAAGCGTT GTTTGTATTA GATCCACCTT ACCTTTGCAC CAAGCAGGAA AGCTACAAAC AAGCTACCTA
>.....Hia5.....>
      D G V E I V K E S F H T L L P K F S N D P K A L F V L D P P Y L C T K Q E S Y K Q A T
1041 TTTTGATTTG ATTGATTTCT TGCGACTGGT CAATATCAGC CGACCGCCGT ATGTTTCTT TAGCTCGACG AAGTCGGAGT TTATTCGCTT TGTGAATTAT ATGCTGGAAG ATAAGGTGGA TAATTGGCAG
>.....Hia5.....>
      Y F D L I D F L R L V N I T R P P Y V F F S S T K S E F I R F V N Y M L E D K V D N W Q
1171 GCGTTTGAAA ACGCCAAACG GATTACAGTC AATGCCAAAC TGAAGTATCA AGTGGCGTAT GAAGACAATT TAGTCTATAA ATTCTAGCAG TAACAAAGGC TTCGAGTAAT CACGAAGCCT TTGTTTGTAGT
>.....Hia5.....>>
      A F E N A K R I T V N A K L N Y Q V A Y E D N L V Y K F -
1301 CTTCTAATTC GGAAAGTAAA CAATAAACG GT

```

**Figure 2S.** Nucleotide sequence of a 1332-bp fragment of *H. influenzae* biotype aegyptius ATCC 11116 genomic DNA containing the *comHia* and *hia5* genes. The derived amino acid sequences of the ComHia and Hia5 proteins are shown below the DNA sequence.

```

ComHia5      1 MQSIKAIRCTFCNKLLAKVGMVGYLEIKCPRCKTVNTTR 39
HI1522.1    1 MQSIKVIRCTFCNKLLAKVGIVGYLEIKCPRCKTVNTTR 39
MuCom       1 ---MKSIRCKNCNKLLFKADSFDHIEIRCPRCKRHIIMLNACEHPTEKHCGKREKITHSDETVRY 62

```

**Figure 3S.** Alignment of the putative Com-like amino acid sequence of *H. influenzae* biotype aegyptius ATCC 11116 with the predicted HI1522.1 Com-like protein of *H. influenzae* Rd and Mu Com. Conserved amino acid residues are shaded green. Four conserved cysteine residues that form the zinc finger are underlined.



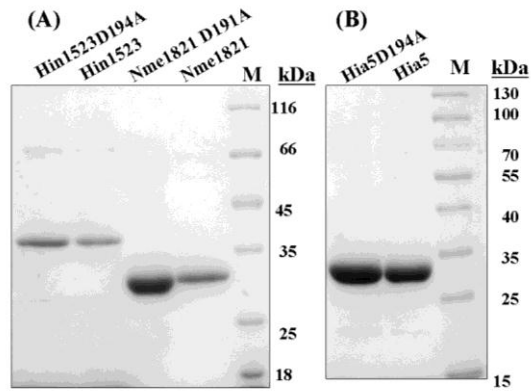

**Figure 4S.** Coomassie-stained SDS-12% PAGE gels of purified recombinant proteins: Hin1523, Nme1821 and their respective mutant variants Hin1523D194A and Nme1821D191A (A), and Hia5 and its mutant variant Hia5D194A (B). M – Molecular mass marker.

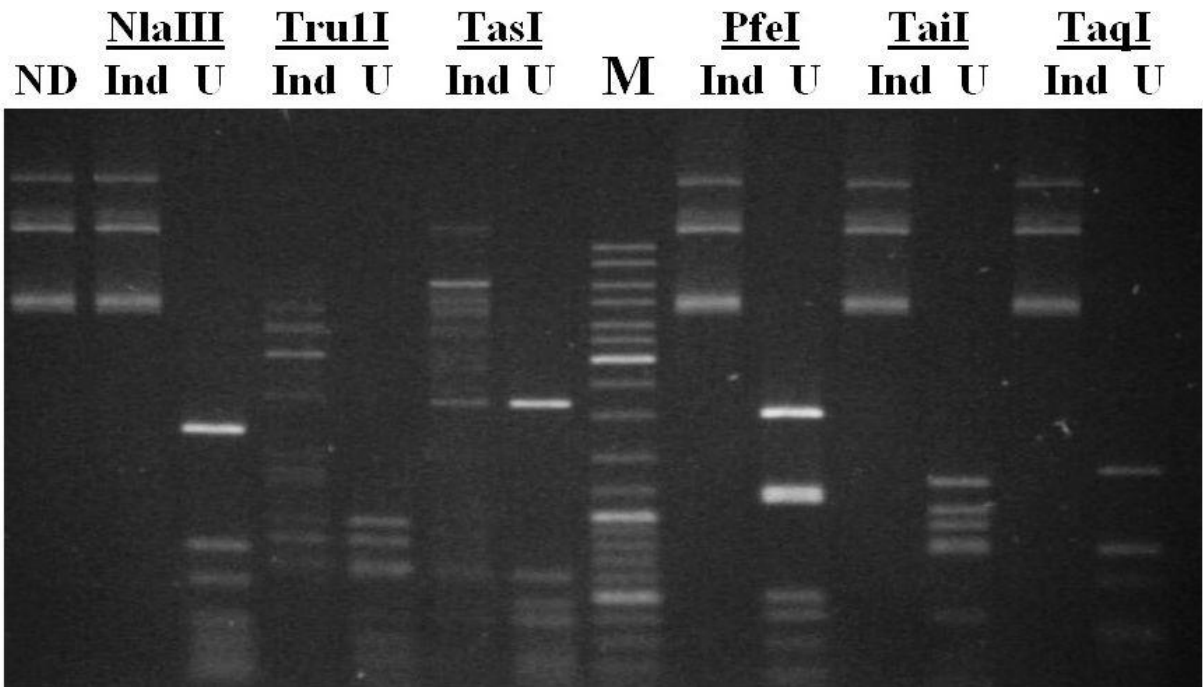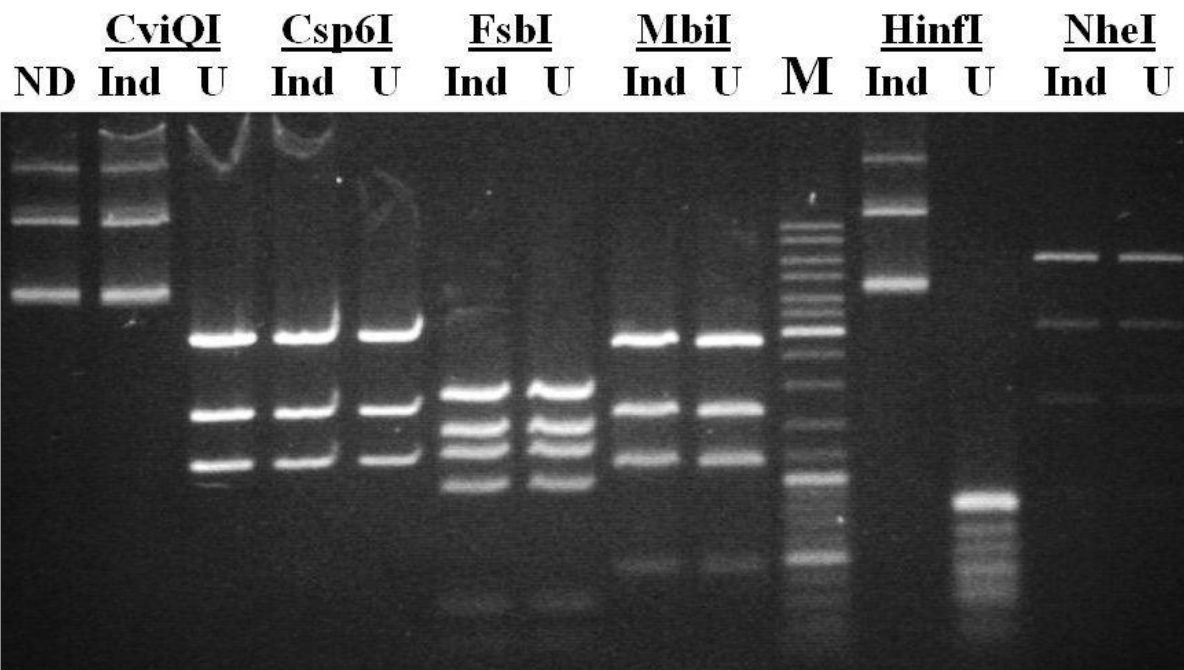

**Figure 5S.** Comparative restriction patterns of plasmid pHia5ET DNA prepared from *E. coli* ER2566 cells grown in the presence (Ind = pHia5ETi) or absence (U = pHia5ET) of inducer IPTG and cleaved with selected REases. Digest mixtures were electrophoresed on 0.8% agarose gels and stained with ethidium bromide. M – GeneRuler 100-10,000 bp size marker.

$\lambda$  dam<sup>+</sup> dcm<sup>+</sup>                      Hia5 methylated  $\lambda$  DNA                       $\lambda$  dam<sup>-</sup> dcm<sup>-</sup>  
 DpnI   MboI   Bsp143I   ND   DpnI   MboI   Bsp143I   MboI   Bsp143I   DpnI

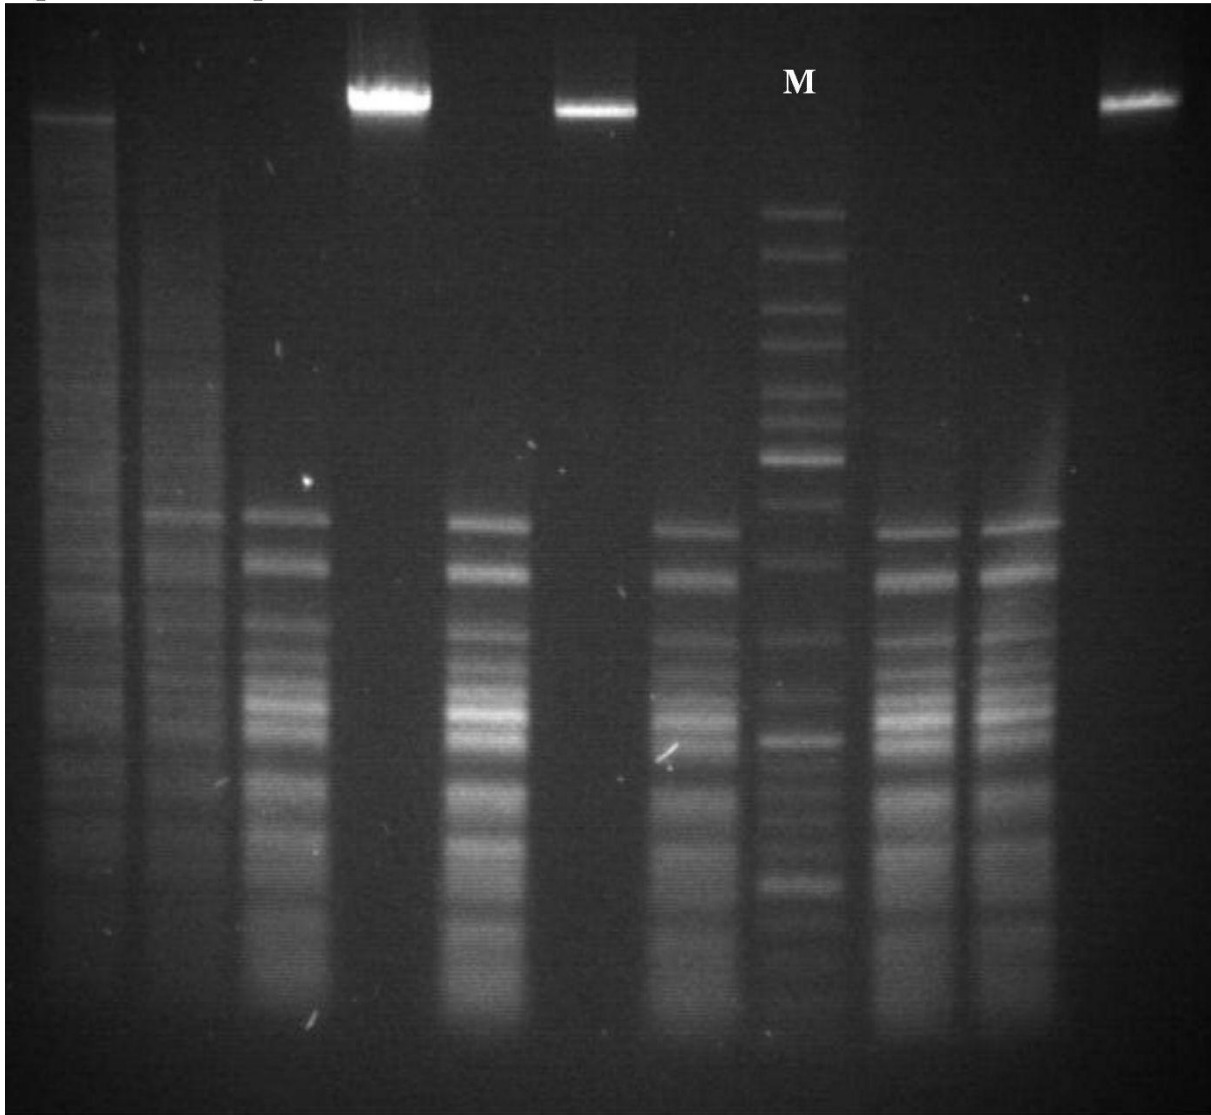

**Figure 6S.** Comparative restriction patterns of  $\lambda$  DNA dam<sup>+</sup> dcm<sup>+</sup>,  $\lambda$  DNA dam<sup>-</sup> dcm<sup>-</sup> (controls) and Hia5 *in vitro*-methylated  $\lambda$  DNA cleaved with REases MboI, DpnI and Bsp143I. Digest mixtures were electrophoresed on 0.8% agarose gels and stained with ethidium bromide. ND- undigested  $\lambda$  DNA. M – GeneRuler 100-10,000 bp size marker.

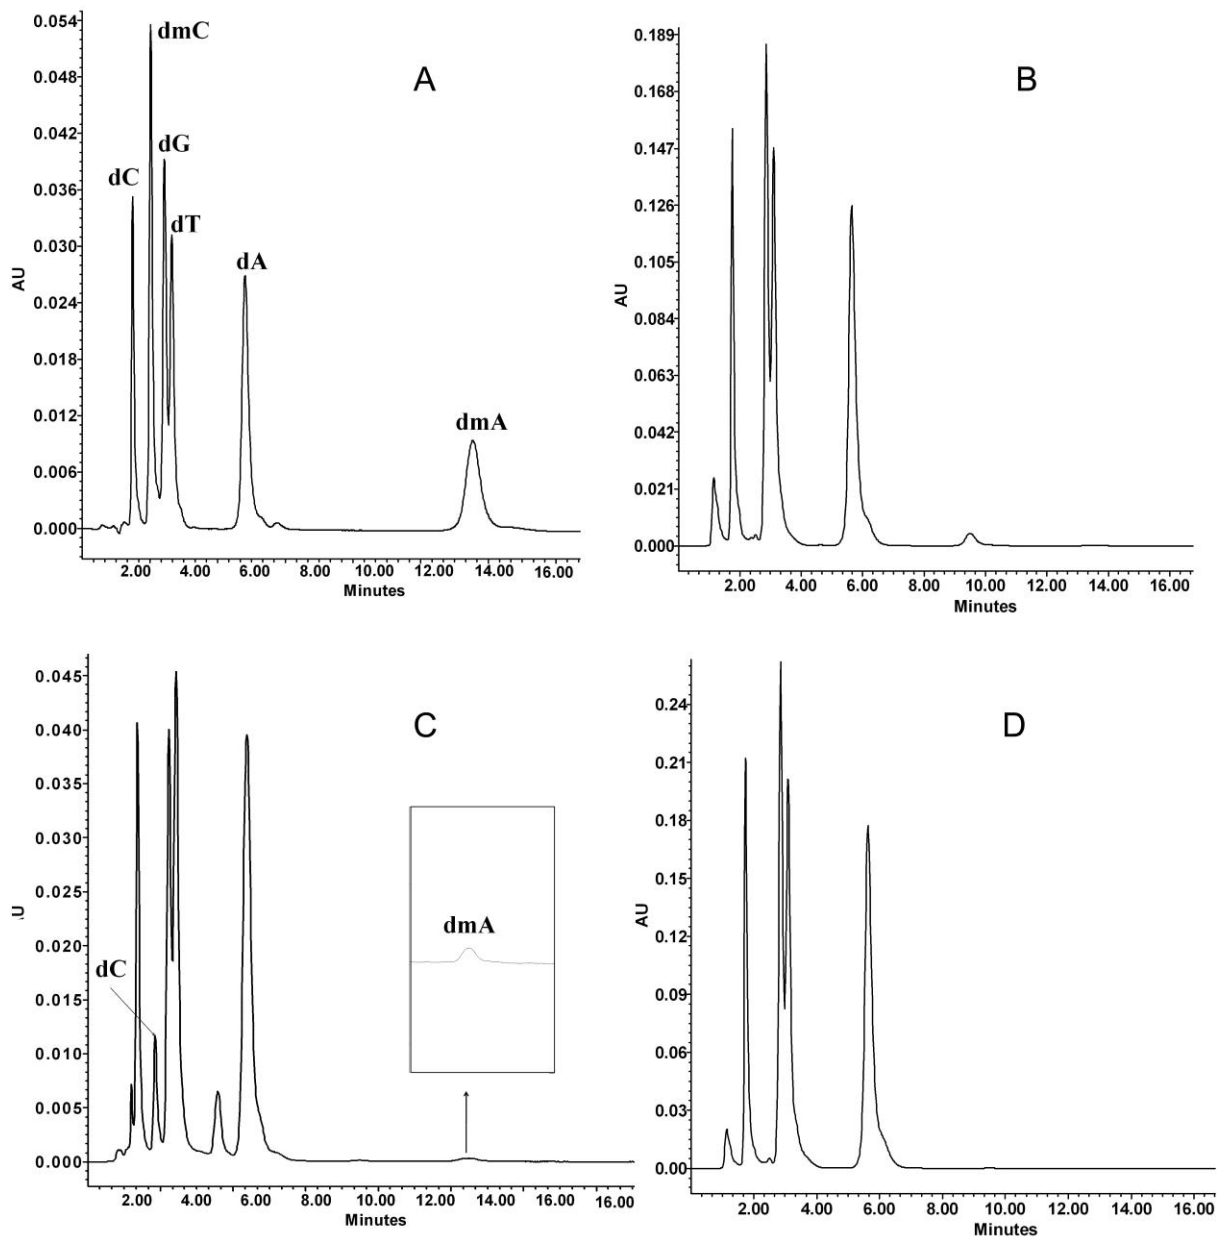

**Figure 7S.** HPLC profiles of deoxynucleosides in the standards mixture (A), and enzymatic digests of  $\lambda$  DNA *dam*<sup>+</sup> *dcm*<sup>+</sup> (B), the genomic DNA of *H. influenzae* biotype *aegyptius* ATCC 11116 (C) and  $\lambda$  DNA *dam*<sup>-</sup> *dcm*<sup>-</sup> (D).

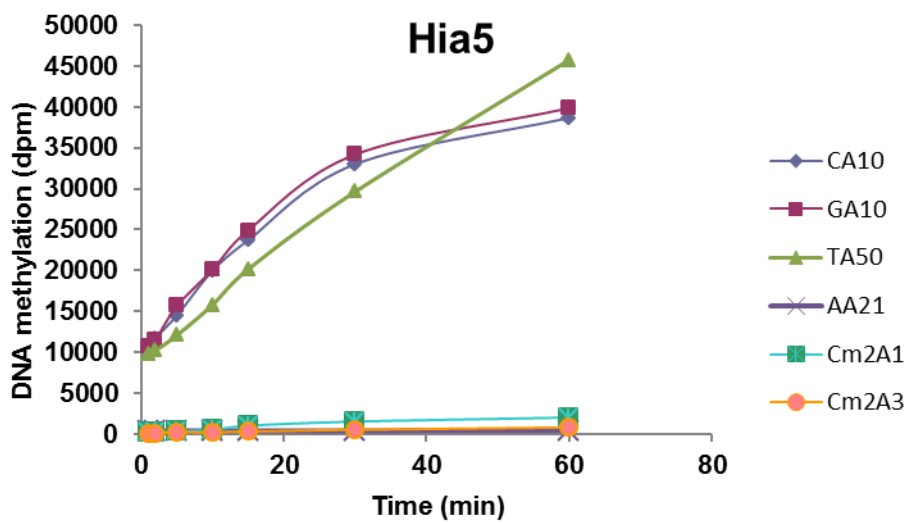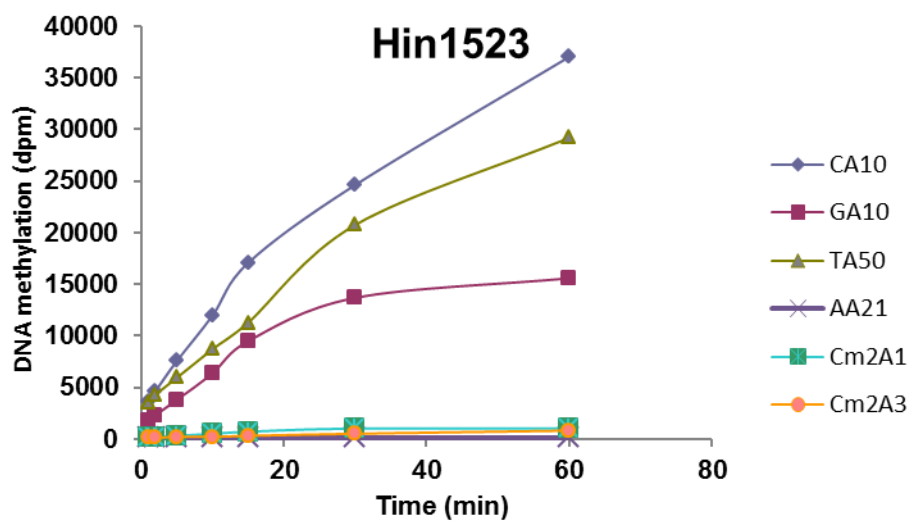

**Figure 8S.** Example of DNA methylation kinetics with the Hia5 or Hin1523 enzymes and synthetic oligonucleotides (**Table 2S**).

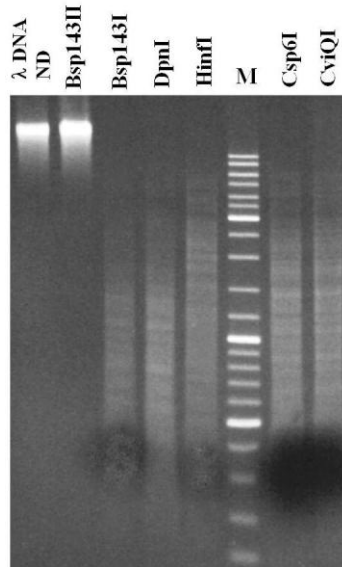

**Figure 9S.** Restriction patterns of *H. influenzae* biotype aegyptius ATCC 11116 genomic DNA cleaved with selected REases: Bsp143II (RGCGCY), Bsp143I (GATC), DpnI (Gm<sup>6</sup>ATC), HinfI (GANTC), Csp6I (GTAC) and CviQI (GTAC). Digest mixtures were electrophoresed on 0.8% agarose gels and stained with ethidium bromide. ND- undigested  $\lambda$  DNA. M – GeneRuler 100-10,000 bp size marker.
